# Supplementary material for: Soluble polyfluorene dots as photocatalyst for light-driven methylene blue degradation and hydrogen generation
Source: Royal Society of Chemistry journal article supplement (doi:10.1039/d0nj05037g), 2020-12-16
Supplement: d0nj05037g1.pdf [file d0nj05037g1.pdf]

## Supporting Information

### **Soluble Polyfluorene Dots as Photocatalyst for Light-Driven Methylene Blue Degradation and Hydrogen Generation**

Junfeng Yang <sup>a</sup>, He Su <sup>a</sup>, Yanhui Dong <sup>a</sup>, Yunhao Fu <sup>a</sup>, Xingyuan Guo <sup>c</sup>, Hang Sun <sup>b</sup>  
and Shengyan Yin<sup>\*,a</sup>

*<sup>a</sup>State Key Laboratory of Integrated Optoelectronics, College of Electronic Science  
and Engineering, Jilin University, Changchun, Jilin 130012, China*

*<sup>b</sup>Key Laboratory of Bionic Engineering (Ministry of Education), College of Biological  
and Agricultural Engineering, Jilin University, Changchun, Jilin 130022, P. R. China*

*<sup>c</sup>College of Physics Jilin University, Changchun, Jilin 130012, China*

*Corresponding Author: [syyin@jlu.edu.cn](mailto:syyin@jlu.edu.cn)*

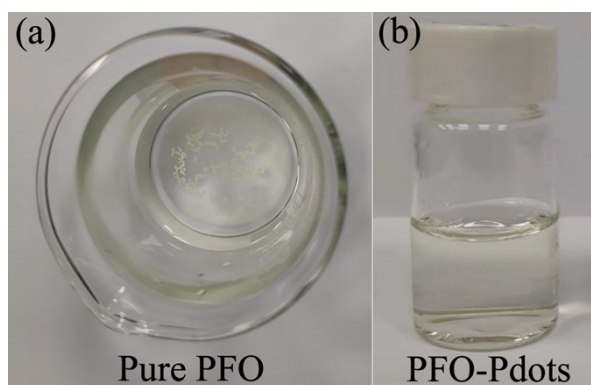

**Fig. S1.** The photographs of (a) pure PFO and (b) PFO Pdots in water.

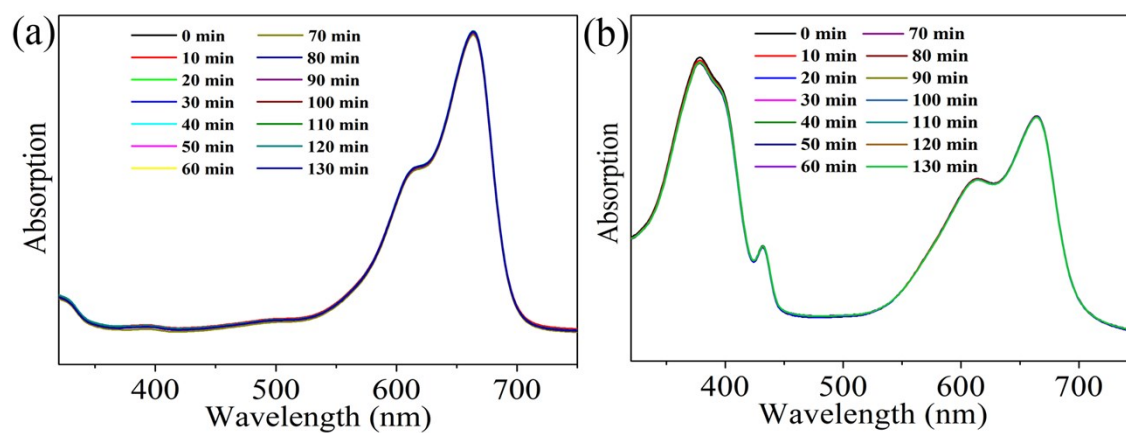

**Fig. S2.** UV-Vis absorption spectra of (a) pure MB and (b) MB with PFO-Pdots in dark.

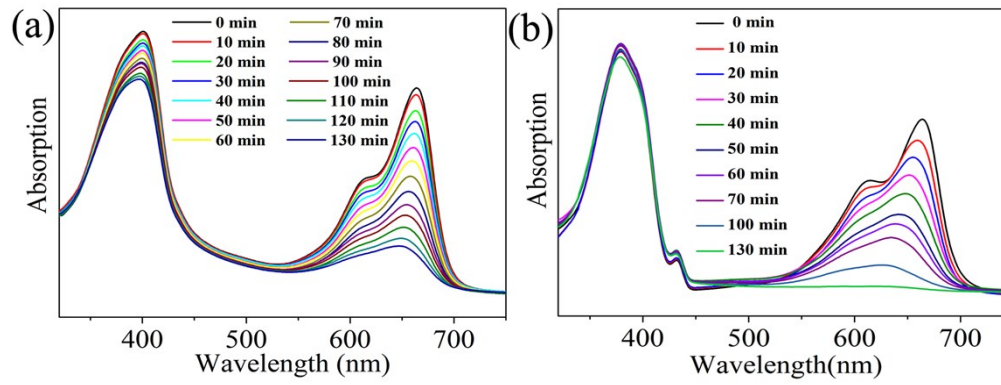

**Fig. S3.** UV-Vis absorption spectra of (a) MB and PFO and (b) MB and PFO-Pdots under illumination of a continuous simulated solar light.

**Table S1.** Hydrogen production peak areas of pure PFO and PFO-Pdots in water.

| Peak area | 0 h | 1 h    | 2 h    | 3 h    | 4 h    | 5 h    | 6 h     |
|-----------|-----|--------|--------|--------|--------|--------|---------|
| Pure PFO  | 0   | 0      | 0      | 0      | 0.2238 | 0.2548 | 0.2573  |
| PFO Pdots | 0   | 1.1526 | 2.2575 | 4.4904 | 6.4011 | 8.2659 | 10.0656 |
